# Supplementary material
Source: publisher figshare collection journal article supplement (https://tandf.figshare.com/articles/dataset/_/4789228)
Supplement: Supplementary file 1 [file 1]

Table S1 Primers used in this study

|              |                                                       |
|--------------|-------------------------------------------------------|
| ure2-d-W     | 5'-TTGCTGCGTGTAACACAAC-3'                             |
| ure2-d -X    | 5'-GGGGATCCGTCGACCTGCAGCGTACGAGTTGGAACAACGCTAGAGTG-3' |
| ure2-d -Y    | 5'-GTTTAAACGAGCTCGAATTCATCGATGTTTGAGGCCGAGAAATTCC-3'  |
| ure2-d -Z    | 5'-CTTCAGCAGGCTTGAATGAC-3'                            |
| ure2-d -chk1 | 5'-TGGAATGTGAGCCTGTAGAC-3'                            |
| ure2-d -chk2 | 5'-ACAGTGCAAATGTAGACGGC-3'                            |
| nb2          | 5'-GTTAACGAGCTCGAATTC                                 |
