# Supplementary material
Source: publisher figshare collection journal article supplement (https://tandf.figshare.com/articles/dataset/_/4789228)
Supplement: Supplementary file 2 [file 1]

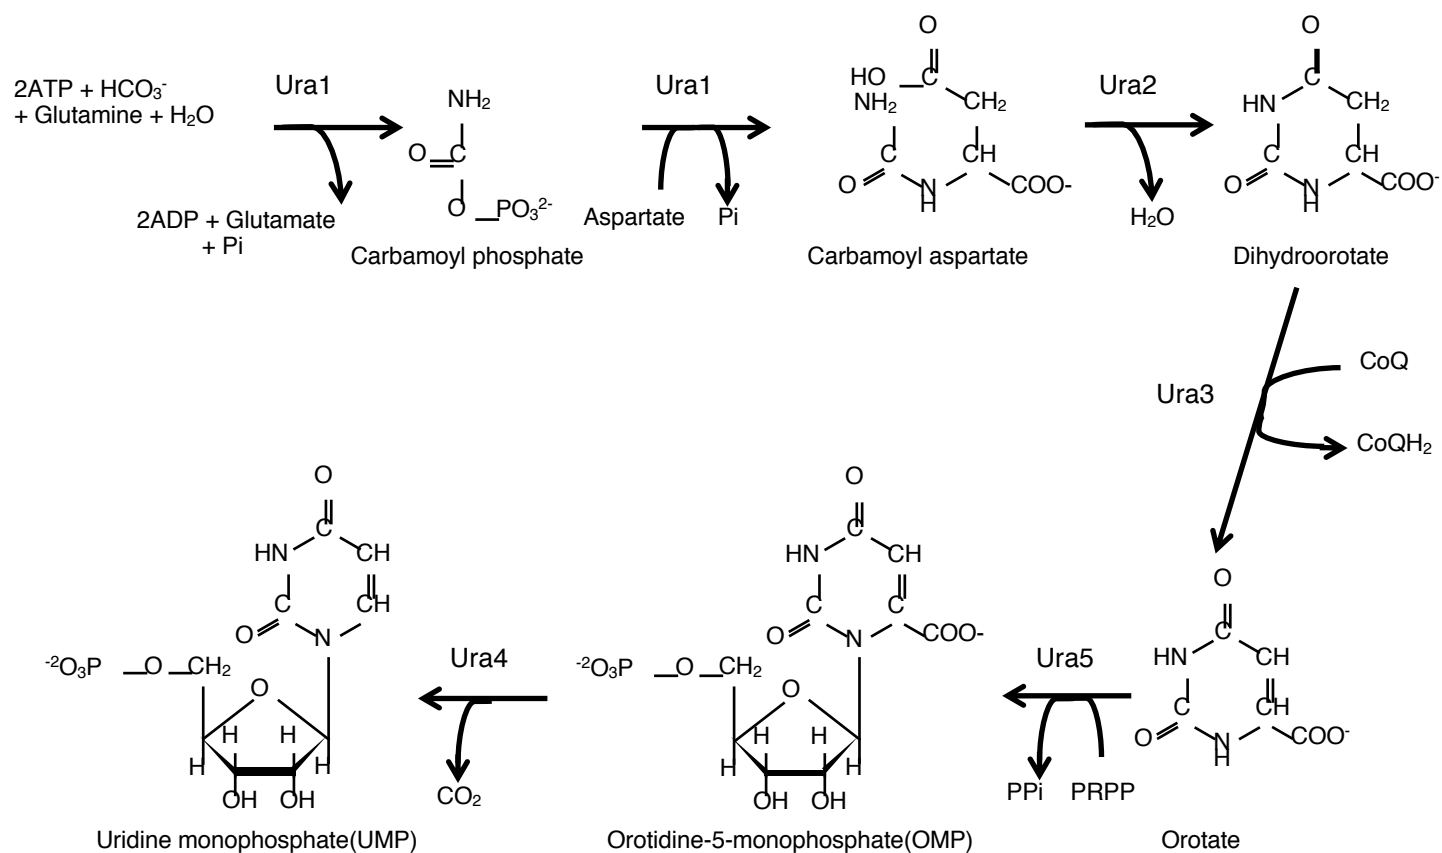

Fig. S1. *de novo* UMP synthesis in *S. pombe* involves six steps and five enzymes. The *de novo* synthesis of UMP in *S. pombe* is outlined. Ura1 is a bi-functional enzyme consisting of carbamoyl phosphate synthetase I and aspartate transcarbamoylase, Ura2 is dihydroorotase, Ura3 is dihydroorotate dehydrogenase that requires quinone as a cofactor and localizes in mitochondria, Ura5 is orotate phosphoribosyltransferase, and Ura4 is OMP decarboxylase.

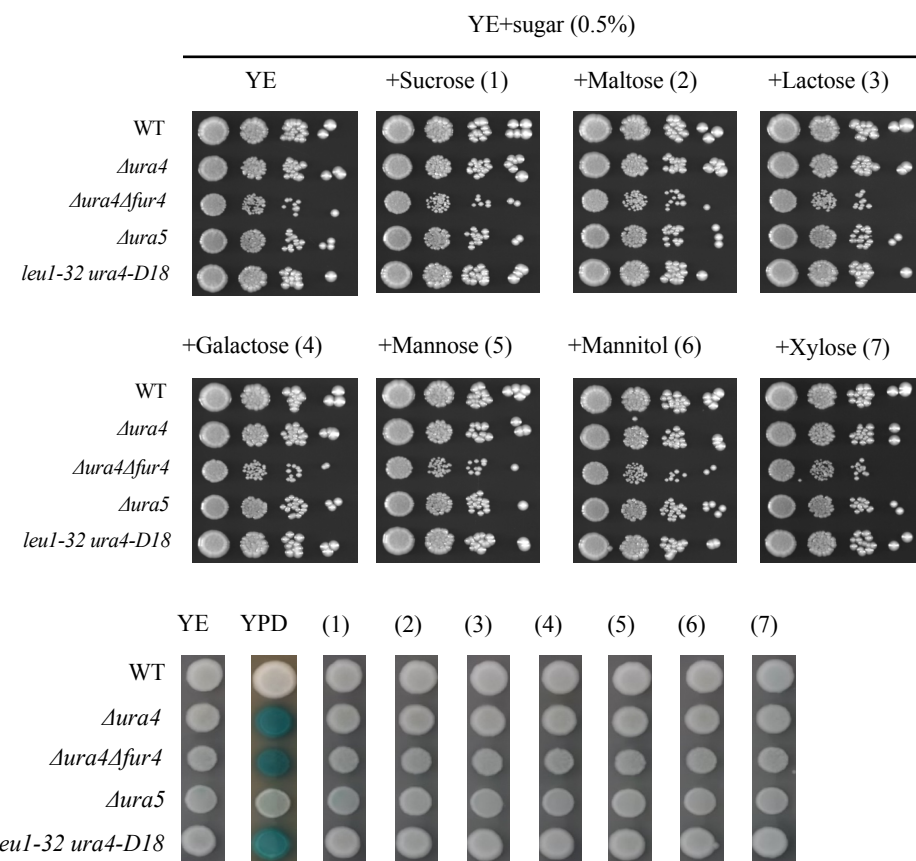

Fig. S2. Effect of sugars on cell lysis  
 L972 (WT; *ura4*<sup>+</sup>), UMP31 ( $\Delta ura4$ ), KNP27 ( $\Delta ura4\Delta fur4$ ), UMP37 ( $\Delta ura5$ ), and PR109 (*ura4-D18*) were grown for 12 h, and then spotted onto YE in the presence of indicated sugars. For the alkaline phosphatase assay, BCIP was used as described in Fig. 1.

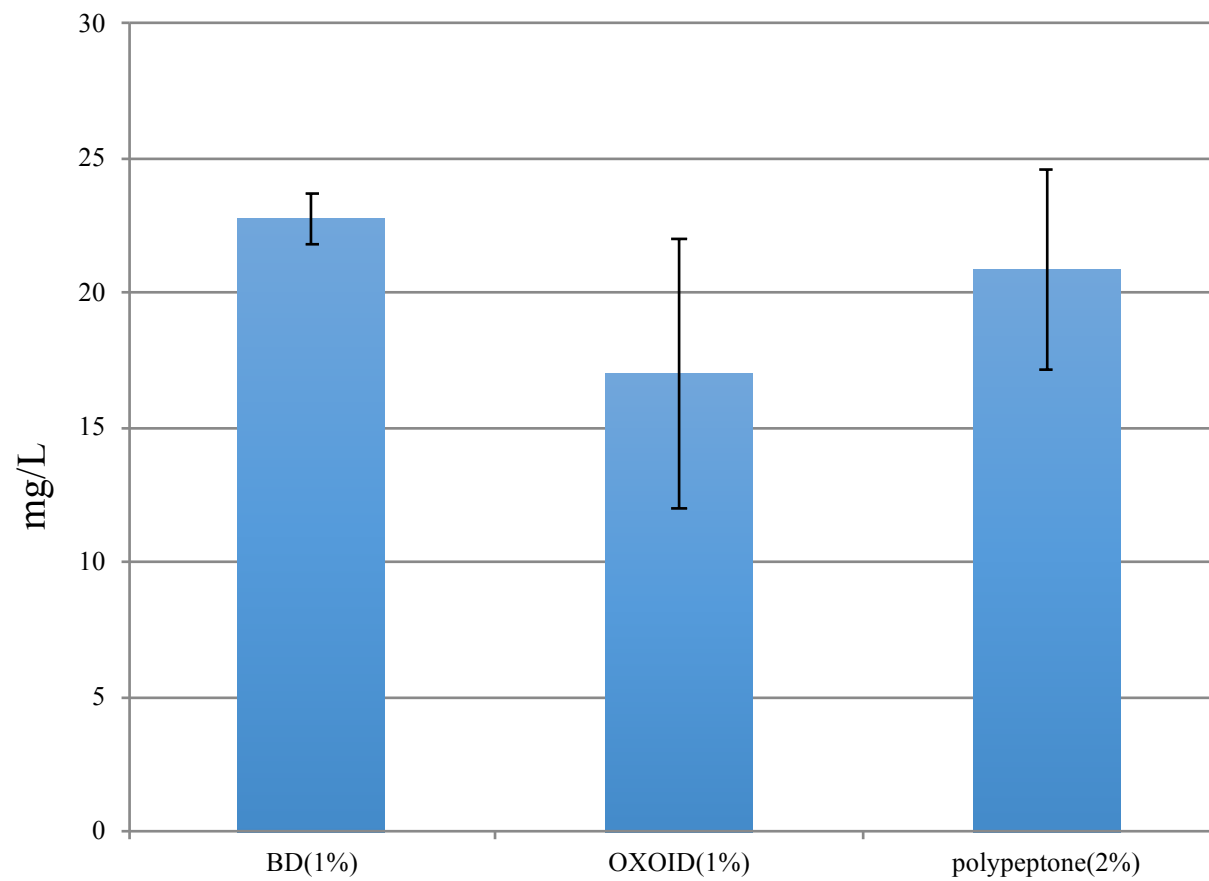

Fig. S3. Urea measurement in yeast extracts and polypeptone  
Concentrations of urea in 1% yeast extract (BD and OXOID) and 2% polypeptone were measured by urea assay kit (BioAssay Systems). S.D. in duplicate samples are shown.

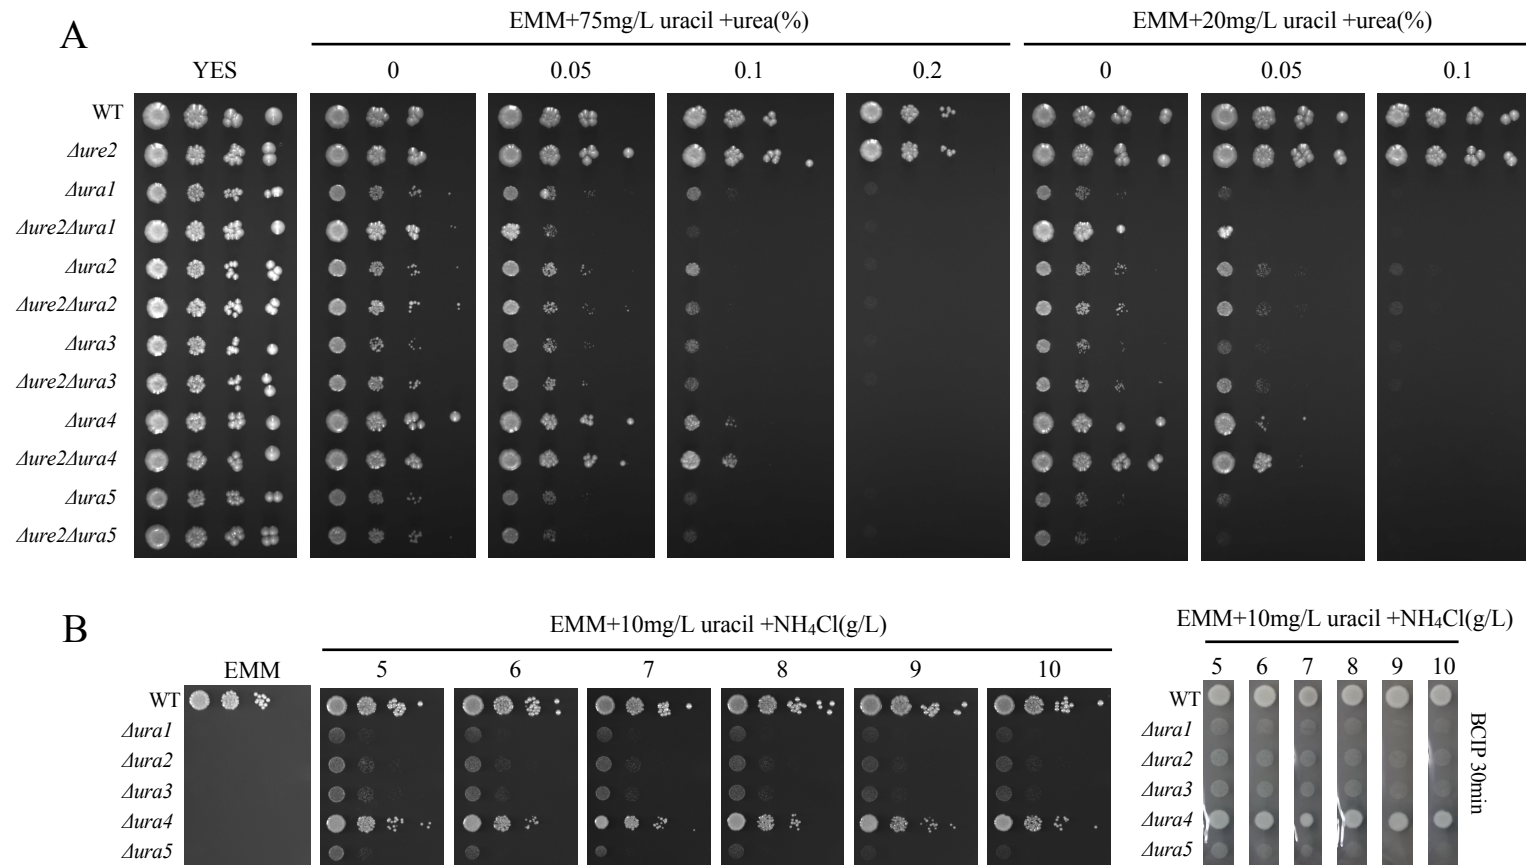

Fig. S4. (A) Deletion of the *ure2* gene does not suppress growth of uracil auxotrophic strains on EMMU medium. L972 (WT; *ura4*<sup>+</sup>), UMP34 ( $\Delta ura1$ ), UMP35 ( $\Delta ura2$ ), UMP36 ( $\Delta ura3$ ), UMP31 ( $\Delta ura4$ ), UMP37 ( $\Delta ura5$ ), KNP174 ( $\Delta ure2$ ), KNP178 ( $\Delta ura1\Delta ure2$ ), KNP180 ( $\Delta ura2\Delta ure2$ ), KNP182 ( $\Delta ura3\Delta ure2$ ), KNP176 ( $\Delta ura4\Delta ure2$ ), and KNP184 ( $\Delta ura5\Delta ure2$ ) were grown for 12 h, and then spotted onto EMMU (10mg/L uracil) in the presence or absence of urea (0%, 0.05%, or 0.1%) and incubated for 3 days. (B) High concentration of NH<sub>4</sub>Cl does not induce cell lysis of  $\Delta ura4$  strains in EMM medium. L972 (WT; *ura4*<sup>+</sup>), UMP34 ( $\Delta ura1$ ), UMP35 ( $\Delta ura2$ ), UMP36 ( $\Delta ura3$ ), UMP31 ( $\Delta ura4$ ), and UMP37 ( $\Delta ura5$ ) were grown for 12 h, spotted on low uracil-containing EMM medium (10 mg/L) in the presence or absence of NH<sub>4</sub>Cl (5, 6, 7, 8, 9 or 10g/L), and incubated for 3 days. For the alkaline phosphatase assay, BCIP was used as described in Fig. 2.
